# Supplementary material
Source: PubMed Central journal article supplement (PMC4958522)
Supplement: NIHMS790328-supplement-supplement_1.pdf [file NIHMS790328-supplement-supplement_1.pdf]

## Supporting Information

### **CRISPR-Cas9-modified *pfmdr1* protects *Plasmodium falciparum* asexual blood stages and gametocytes against a class of piperazine-containing compounds but potentiates artemisinin-based combination therapy partner drugs**

Caroline L. Ng<sup>1</sup>, Giulia Siciliano<sup>2</sup>, Marcus C. S. Lee<sup>1</sup>, Mariana J. de Almeida<sup>1</sup>, Victoria C. Corey<sup>3</sup>, Selina E. Bopp<sup>3</sup>, Lucia Bertuccini<sup>4</sup>, Sergio Wittlin<sup>5</sup>, Rachel G. Kasdin<sup>1</sup>, Amélie Le Bihan<sup>6</sup>, Martine Clozel<sup>6</sup>, Elizabeth A. Winzeler<sup>3</sup>, Pietro Alano<sup>2</sup>, and David A. Fidock<sup>1,7</sup>

<sup>1</sup>Department of Microbiology and Immunology, Columbia University Medical Center, New York, NY 10032, USA; <sup>2</sup>Dipartimento di Malattie Infettive, Parassitarie ed Immunomediate, Istituto Superiore di Sanità, 00161 Rome, Italy; <sup>3</sup>Division of Host-Microbe Systems & Therapeutics, Department of Pediatrics, University of California San Diego, La Jolla, CA 92093, USA; <sup>4</sup>Dipartimento Tecnologie e Salute, Istituto Superiore di Sanità, 00161 Rome, Italy; <sup>5</sup>Department of Medical Parasitology and Infection Biology, Swiss Tropical and Public Health Institute, CH-4002 Basel, Switzerland; <sup>6</sup>Department of Drug Discovery, Actelion Pharmaceuticals Ltd., CH-4123, Allschwil, Switzerland; <sup>7</sup>Division of Infectious Diseases, Department of Medicine, Columbia University Medical Center, New York, NY 10032, USA

## TABLE OF CONTENTS

|                                                                                                            |    |
|------------------------------------------------------------------------------------------------------------|----|
| Title Page                                                                                                 | 1  |
| Table of Contents                                                                                          | 2  |
| Fig. S1 Chemical structures of the piperazine-containing compounds ACT-213615, ACT-451840, and piperaquine | 3  |
| Fig. S2 Identities and positions of guide RNAs (gRNAs) directed to <i>pfmdr1</i>                           | 4  |
| Fig. S3 Sensitivity of ACT-451840-resistant lines to antimalarial drugs                                    | 5  |
| Fig. S4 Growth rates measured in parental and mutant PfMDR1 parasites                                      | 6  |
| Table S1 Frequency of recrudescence in ACT-451840-pressured <i>P. falciparum</i> lines                     | 7  |
| Table S2 PfMDR1 variants identified in ACT451480-selected lines                                            | 8  |
| Table S3 Whole-genome sequencing                                                                           | 9  |
| Table S4 ACT-451840 resistance in 7G8, Dd2, and NF54 parental and selected lines                           | 10 |
| Table S5 CRISPR-Cas9 engineered lines                                                                      | 10 |
| Table S6 Cross-resistance to licensed antimalarials in asexual parasites                                   | 11 |
| Table S7 Sensitivity to ACT-451840 in parental and resistant early and mature gametocytes                  | 12 |
| Table S8 List of primers used in this study                                                                | 13 |
| References                                                                                                 | 14 |



**A**

| gRNA | Sequence                  | Sequence with binding site mutations | Distance (#nt)<br>away from: |         | Doensch<br>score | Editing<br>success |
|------|---------------------------|--------------------------------------|------------------------------|---------|------------------|--------------------|
|      |                           |                                      | nt 2523                      | nt 2772 |                  |                    |
| 1    | GCTTATAAAGACTCAGATACAGG   | GCGTACAAGGATAGCGACACGGG              | (+) 354                      | (+) 603 | 0.256            | 0 of 2             |
| 2    | GATCAAGATAAAAATACCCCAGG   | GACCAGGACAAGAACAACACTCCGGG           | (-) 114                      | (+) 111 | 0.383            | 1 of 2             |
| 3    | GATGTACATTTATTA AAAACGGG  | GACGTGCACTTGTTGAAGACTGG              | (-) 162                      | (+) 63  | 0.280            | 0 of 2             |
| 4    | GTTAATACAGCTGCAACAATTGG   | GTCAACACGGCCGCGACGATAGG              | (-) 264                      | (-) 15  | 0.097            | 0 of 2             |
| 5    | GCTTCCTGTATTA AAAA ACTTGG | GCCTCTTGGATCAAGAACGAGGG              | (-) 420                      | (-) 171 | 0.238            | 0 of 2             |
| 6    | GCTATTGATTATA AAAAATAAAGG | GCGATCGACTACAAGAACAAGGG              | (-) 510                      | (-) 261 | 0.094            | 0 of 2             |
| 7    | GGATCCTTCTTAATTA AAAAGAGG | GGGAGTTTTTTGATCAAGAGGGG              | (-) 621                      | (-) 372 | 0.779            | 0 of 2             |
| 8    | GGAAAATTAATGTCCTTAAAAGG   | GGCAAGTTGATGAGTTTGAAGGG              | (-) 708                      | (-) 459 | 0.215            | 3 of 4             |

Initial G of GN<sub>9</sub>GG shown in red; protospacer adjacent motif shown in blue. Silent binding site substitutions shown in green. Substitutions in nt 2523 result in mutations in aa 841; substitutions in nt 2772 result in mutations in aa 921. (-) indicates mutation is upstream of gRNA; (+) indicates mutation is downstream of gRNA.

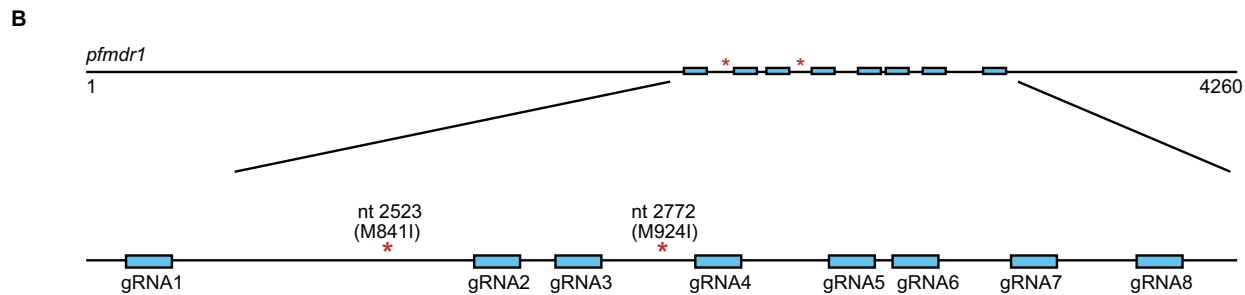

**Fig. S2.** Identities and positions of guide RNAs (gRNAs) directed to *pfmdr1*. **(A)** Tabulated information about *pfmdr1*-specific gRNAs tested in this study, including the distances of each gRNA from the targeted mutations at nucleotide positions 2523 and 2772, the gRNA Doensch scores (Doench *et al.*, 2014), and the editing success (proportion of transfections that resulted in successful *pfmdr1*-edited events). **(B)** Position of gRNA and mutations M841I and M924I within the *pfmdr1* gene.

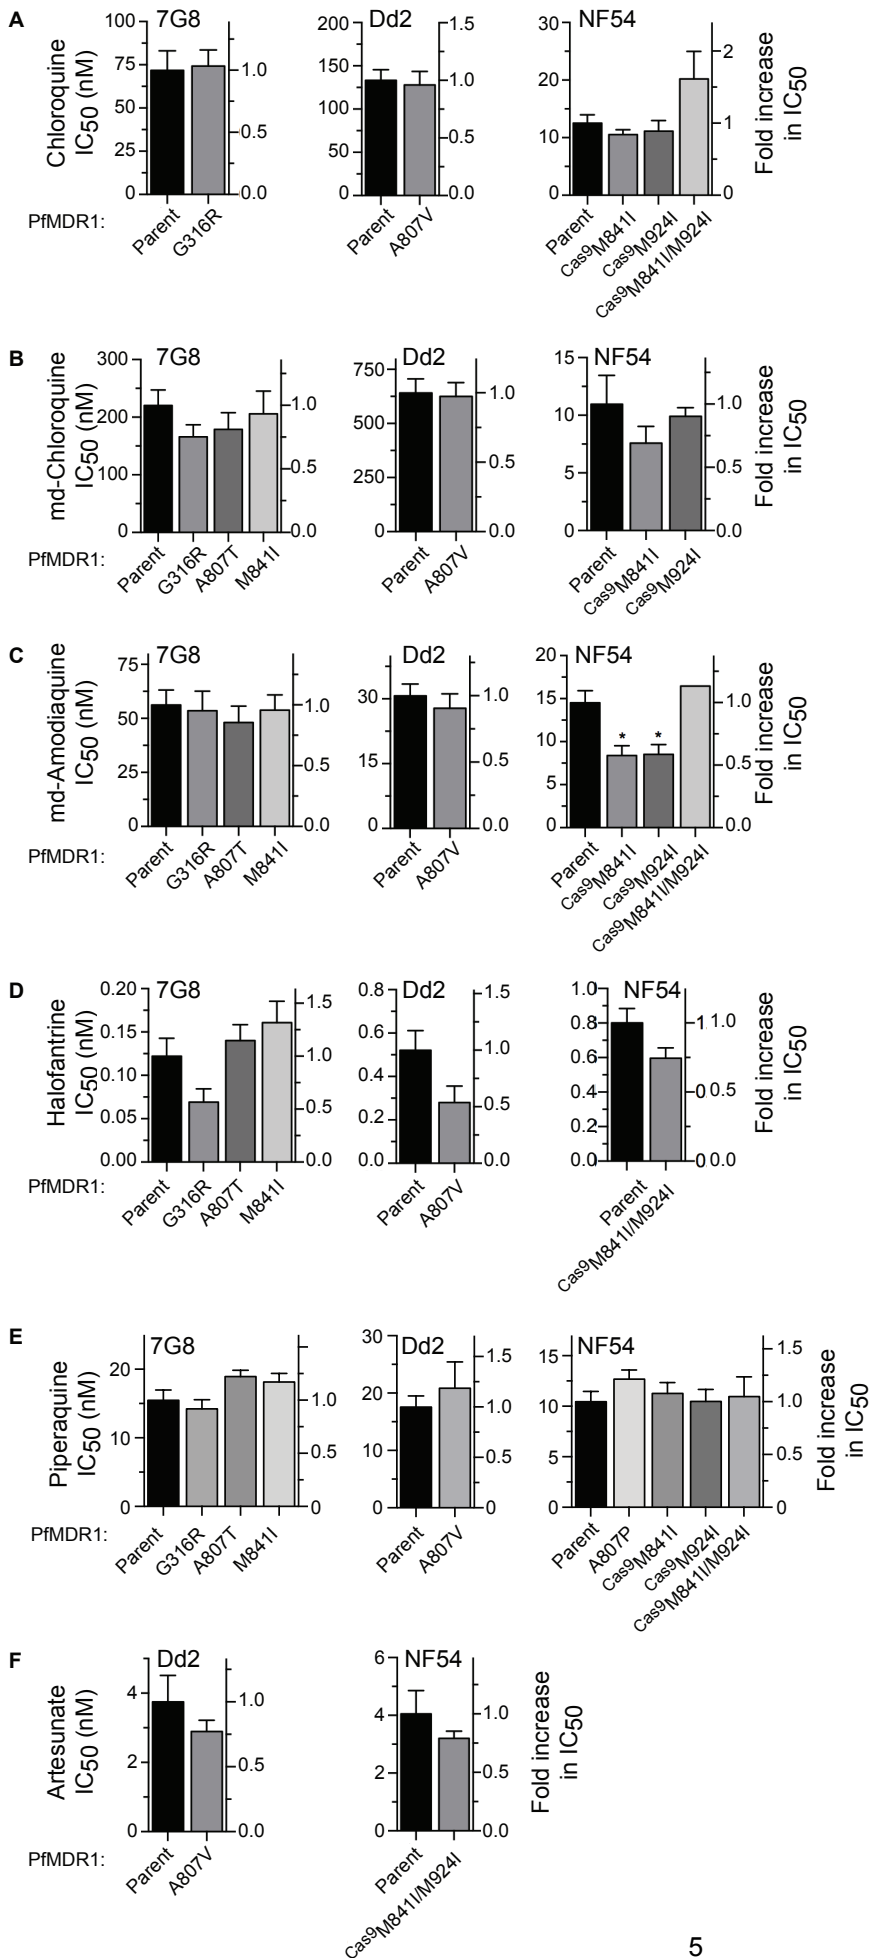

**Fig. S3.** Sensitivity of ACT-451840-resistant lines to antimalarial drugs. IC<sub>50</sub> levels of parental and ACT-451840-resistant lines in 7G8, Dd2, and NF54 backgrounds to (A) chloroquine, (B) monodesethyl (md)-chloroquine, (C) md-amodiaquine, (D) halofantrine, (E) piperazine, and (F) artesunate. Bar graphs display mean IC<sub>50</sub> values ± S.E.M. Student's t-test was performed comparing resistant to parental lines. \**P* < 0.05. Numerical data and numbers of independent repeats are listed in **Table S6**.

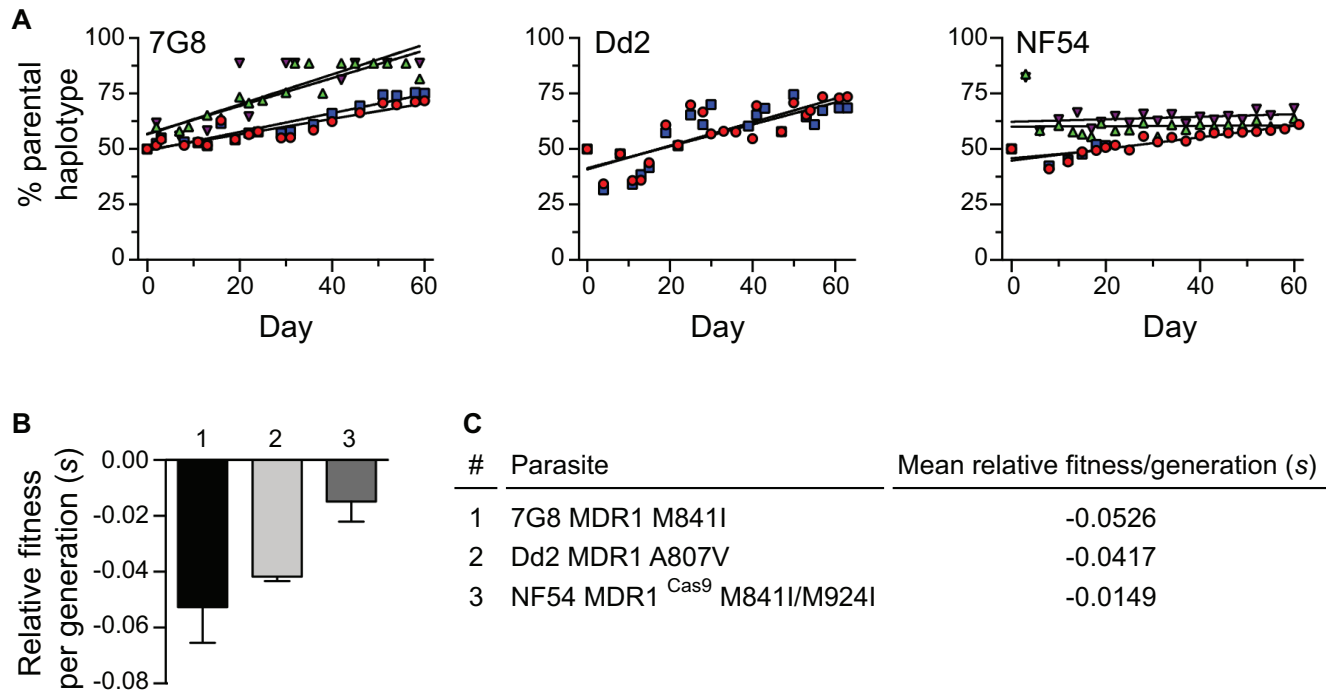

**Fig. S4.** Growth rates measured in parental and mutant PfMDR1 parasites. **(A)** The allelic frequency of co-cultured parental and mutant parasites was monitored over a 60-day period by pyrosequencing. The relative nucleotide proportions of parental vs. mutant alleles in 7G8, Dd2, and NF54 parasites are shown as the proportion of parental parasites in the culture. Each symbol indicates a separate experiment (n=4 for 7G8 and NF54, n=2 for Dd2). **(B)** Quantification of results from **(A)** expressed as the relative fitness per generation (s; (Hartl *et al.*, 1985; Gabryszewski *et al.*, 2016)) of the mutant parasites. Bar graphs display mean s values  $\pm$  S.E.M. **(C)** Numerical depiction of **(B)**.

**Table S1. Frequency of recrudescence in ACT-451840-pressured *P. falciparum* lines.**

| Parasite | Selection pressure (nM)     | Initial inoculum    | Number of positive flasks (day positive) |
|----------|-----------------------------|---------------------|------------------------------------------|
| 7G8      | 1.7 (6 x IC <sub>50</sub> ) | 2 x 10 <sup>9</sup> | 3 of 3 (20, 20, 21)                      |
|          |                             | 2 x 10 <sup>8</sup> | 2 of 3 (21, 61)                          |
|          |                             | 2 x 10 <sup>7</sup> | 2 of 3 (17, 45)                          |
|          |                             | 2 x 10 <sup>6</sup> | 0 of 3                                   |
| Dd2      | 2.7 (4 x IC <sub>50</sub> ) | 2 x 10 <sup>9</sup> | 3 of 3 (19, 19, 19)                      |
|          |                             | 2 x 10 <sup>8</sup> | 2 of 3 (25, 34)                          |
|          |                             | 2 x 10 <sup>7</sup> | 0 of 3                                   |
|          |                             | 2 x 10 <sup>6</sup> | 1 of 6 (29)                              |
|          |                             | 2 x 10 <sup>5</sup> | 0 of 3                                   |
|          |                             | 2 x 10 <sup>4</sup> | 0 of 3                                   |
| NF54     | 2.7 (5 x IC <sub>50</sub> ) | 2 x 10 <sup>9</sup> | 2 of 2 (18, 19)                          |
|          |                             | 2 x 10 <sup>8</sup> | 3 of 3 (19, 49, 50)                      |
|          |                             | 2 x 10 <sup>7</sup> | 2 of 3 (22, 24)                          |
|          |                             | 2 x 10 <sup>6</sup> | 0 of 3                                   |

**Table S2. PfMDR1 variants identified in ACT-451480-selected lines.**

| Name                  | PfMDR1 position and amino acid |          |          |          |          |          |          |          |          |          |          |          |          |          |          |          |          |          |          |          | ACT-451840 |                         |
|-----------------------|--------------------------------|----------|----------|----------|----------|----------|----------|----------|----------|----------|----------|----------|----------|----------|----------|----------|----------|----------|----------|----------|------------|-------------------------|
|                       | 74                             | 86       | 184      | 290      | 297      | 316      | 321      | 326      | 379      | 806      | 807      | 841      | 921      | 924      | 1034     | 1042     | 1066     | 1069     | 1076     | 1088     | 1246       | IC <sub>50</sub> tested |
| Canonical WT          | F                              | N        | Y        | Y        | G        | G        | I        | V        | G        | F        | A        | M        | R        | M        | S        | N        | S        | T        | Y        | E        | D          | -                       |
| 7G8 MDR1 parent       | F                              | N        | <b>F</b> | Y        | G        | G        | I        | V        | G        | F        | A        | M        | R        | M        | <b>C</b> | <b>D</b> | S        | T        | Y        | E        | <b>Y</b>   | Yes                     |
| 7G8 MDR1 G316R        | F                              | N        | <b>F</b> | Y        | G        | <b>R</b> | I        | V        | G        | F        | A        | M        | R        | M        | <b>C</b> | <b>D</b> | S        | T        | Y        | E        | <b>Y</b>   | Yes                     |
| 7G8 MDR1 A807T        | F                              | N        | <b>F</b> | Y        | G        | G        | I        | V        | G        | F        | <b>T</b> | M        | R        | M        | <b>C</b> | <b>D</b> | S        | T        | Y        | E        | <b>Y</b>   | Yes                     |
| 7G8 MDR1 M841I        | F                              | N        | <b>F</b> | Y        | G        | G        | I        | V        | G        | F        | A        | <b>I</b> | R        | M        | <b>C</b> | <b>D</b> | S        | T        | Y        | E        | <b>Y</b>   | Yes                     |
| Dd2 MDR1 parent       | F                              | <b>Y</b> | Y        | Y        | G        | G        | I        | V        | G        | F        | A        | M        | R        | M        | S        | N        | S        | T        | Y        | E        | D          | Yes                     |
| Dd2 MDR1 A807V        | F                              | <b>Y</b> | Y        | Y        | G        | G        | I        | V        | G        | F        | <b>V</b> | M        | R        | M        | S        | N        | S        | T        | Y        | E        | D          | Yes                     |
| Dd2 MDR1 M841I        | F                              | <b>Y</b> | Y        | Y        | G        | G        | I        | V        | G        | F        | A        | <b>I</b> | R        | M        | S        | N        | S        | T        | Y        | E        | D          | Yes                     |
| Dd2 MDR1 Y1076F       | F                              | <b>Y</b> | Y        | Y        | G        | G        | I        | V        | G        | F        | A        | M        | R        | M        | S        | N        | S        | T        | <b>F</b> | E        | D          | Yes                     |
| NF54 MDR1 parent      | F                              | N        | Y        | Y        | G        | G        | I        | V        | G        | F        | A        | M        | R        | M        | S        | N        | S        | T        | Y        | E        | D          | Yes                     |
| NF54 MDR1 F74S        | <b>S</b>                       | N        | Y        | Y        | G        | G        | I        | V        | G        | F        | A        | M        | R        | M        | S        | N        | S        | T        | Y        | E        | D          | No                      |
| NF54 MDR1 Y290F       | F                              | N        | Y        | <b>F</b> | G        | G        | I        | V        | G        | F        | A        | M        | R        | M        | S        | N        | S        | T        | Y        | E        | D          | Yes                     |
| NF54 MDR1 G297V       | F                              | N        | Y        | Y        | <b>V</b> | G        | I        | V        | G        | F        | A        | M        | R        | M        | S        | N        | S        | T        | Y        | E        | D          | Yes                     |
| NF54 MDR1 I321F       | F                              | N        | Y        | Y        | G        | G        | <b>F</b> | V        | G        | F        | A        | M        | R        | M        | S        | N        | S        | T        | Y        | E        | D          | Yes                     |
| NF54 MDR1 V326E       | F                              | N        | Y        | Y        | G        | G        | I        | <b>E</b> | G        | F        | A        | M        | R        | M        | S        | N        | S        | T        | Y        | E        | D          | No                      |
| NF54 MDR1 G379D       | F                              | N        | Y        | Y        | G        | G        | I        | V        | <b>D</b> | F        | A        | M        | R        | M        | S        | N        | S        | T        | Y        | E        | D          | No                      |
| NF54 MDR1 F806L       | F                              | N        | Y        | Y        | G        | G        | I        | V        | G        | <b>L</b> | A        | M        | R        | M        | S        | N        | S        | T        | Y        | E        | D          | No                      |
| NF54 MDR1 A807P       | F                              | N        | Y        | Y        | G        | G        | I        | V        | G        | F        | <b>P</b> | M        | R        | M        | S        | N        | S        | T        | Y        | E        | D          | Yes                     |
| NF54 MDR1 A807V       | F                              | N        | Y        | Y        | G        | G        | I        | V        | G        | F        | <b>V</b> | M        | R        | M        | S        | N        | S        | T        | Y        | E        | D          | Yes                     |
| NF54 MDR1 M841I+M924I | F                              | N        | Y        | Y        | G        | G        | I        | V        | G        | F        | A        | <b>I</b> | R        | <b>I</b> | S        | N        | S        | T        | Y        | E        | D          | Yes                     |
| NF54 MDR1 R921G       | F                              | N        | Y        | Y        | G        | G        | I        | V        | G        | F        | A        | M        | <b>G</b> | M        | S        | N        | S        | T        | Y        | E        | D          | No                      |
| NF54 MDR1 S1066P      | F                              | N        | Y        | Y        | G        | G        | I        | V        | G        | F        | A        | M        | R        | M        | S        | N        | <b>P</b> | T        | Y        | E        | D          | No                      |
| NF54 MDR1 T1069I      | F                              | N        | Y        | Y        | G        | G        | I        | V        | G        | F        | A        | M        | R        | M        | S        | N        | S        | <b>I</b> | Y        | E        | D          | No                      |
| NF54 MDR1 Y1076H      | F                              | N        | Y        | Y        | G        | G        | I        | V        | G        | F        | A        | M        | R        | M        | S        | N        | S        | T        | <b>H</b> | E        | D          | Yes                     |
| NF54 MDR1 E1088K      | F                              | N        | Y        | Y        | G        | G        | I        | V        | G        | F        | A        | M        | R        | M        | S        | N        | S        | T        | Y        | <b>K</b> | D          | No                      |

Blue letters indicate residues that differ from 3D7, the canonical wild-type *P. falciparum* parasite. Red letters indicate residues that differ from parental line.



**Table S3. Whole-genome sequencing.**

| Parasite line Name                          | 7G8 cl.1<br>7G8 MDR1 Parent | 7G8 Act3-1cl.1<br>7G8 MDR1 M841I | 7G8 Act3-2 cl.2<br>7G8 MDR1 A807T | 7G8 Act3-5 cl.1<br>7G8 MDR1 A807T | 7G8 Act3-6 cl.2<br>7G8 MDR1 G316R |
|---------------------------------------------|-----------------------------|----------------------------------|-----------------------------------|-----------------------------------|-----------------------------------|
| Genome coverage (x)                         | 21.47                       | 38.61                            | 47.85                             | 22.95                             | 17.27                             |
| % covered by 5 or more reads                | 76.6                        | 82.5                             | 95.2                              | 75.9                              | 74.5                              |
| SNPs identified                             |                             |                                  |                                   |                                   |                                   |
| raw <sup>a</sup>                            | 44914                       | 54149                            | 62616                             | 46008                             | 41596                             |
| quality <sup>b</sup>                        | 4660                        | 5081                             | 6220                              | 3207                              | 1933                              |
| unique prior to IGV <sup>c</sup>            |                             | 916                              | 2196                              | 270                               | 154                               |
| unique post IGV <sup>c</sup>                |                             | 5                                | 5                                 | 3                                 | 4                                 |
| intergenic                                  |                             | 1                                | 2                                 | 1                                 | 1                                 |
| intronic                                    |                             | 1                                | 2                                 | 0                                 | 1                                 |
| synonymous                                  |                             | 0                                | 0                                 | 0                                 | 0                                 |
| total nonsynonymous                         |                             | 3                                | 1                                 | 2                                 | 2                                 |
| genes mutated in all samples (SNP mutation) |                             | Pf3D7_0523000:<br>MDR1 (M481I)   | Pf3D7_0523000:<br>MDR1 (A807T)    | Pf3D7_0523000:<br>MDR1 (A807T)    | Pf3D7_0523000:<br>MDR1 (G316R)    |

<sup>a</sup>After alignment to *P. falciparum* 3D7 reference genome. <sup>b</sup>Quality filters based on parameters defined in Methods. <sup>c</sup>Compared to 7G8cl1 parent.

**Table S4. ACT-451840 resistance in 7G8, Dd2, and NF54 parental and selected lines.**

| Parasite                              | Mean IC <sub>50</sub> values ± SEM (nM) | Number of assays | p-value  | Clones | IC <sub>50</sub> fold change |
|---------------------------------------|-----------------------------------------|------------------|----------|--------|------------------------------|
| 7G8 MDR1 parent                       | 0.3 ± 0.02                              | 10               | -        | Yes    | 1                            |
| 7G8 MDR1 G316R                        | 9.4 ± 1.4                               | 15               | < 0.0001 | Yes    | 31                           |
| 7G8 MDR1 A807T                        | 8.0 ± 0.6                               | 18               | < 0.0001 | Yes    | 27                           |
| 7G8 MDR1 M841I                        | 9.6 ± 0.8                               | 16               | < 0.0001 | Yes    | 32                           |
| Dd2 MDR1 parent                       | 0.7 ± 0.08                              | 13               | -        | Yes    | 1                            |
| Dd2 MDR1 A807V                        | 8.4 ± 0.5                               | 20               | < 0.0001 | Yes    | 12                           |
| Dd2 MDR1 M841I                        | 8.6 ± 1.2                               | 3                | < 0.0001 | Yes    | 12                           |
| Dd2 MDR1 Y1076F                       | 10.6 ± 2.1                              | 5                | < 0.0001 | Yes    | 15                           |
| NF54 MDR1 parent                      | 0.6 ± 0.04                              | 14               | -        | Yes    | 1                            |
| NF54 MDR1 Y290F                       | 22.7 ± 9.1                              | 2                | < 0.0001 | Yes    | 38                           |
| NF54 MDR1 G297V                       | 50.7 ± 5.0                              | 4                | < 0.0001 | No     | 85                           |
| NF54 MDR1 I322F                       | 6.7 ± 0.3                               | 3                | < 0.0001 | No     | 11                           |
| NF54 MDR1 A807P                       | 65.0 ± 1.7                              | 3                | < 0.0001 | Yes    | 108                          |
| NF54 MDR1 A807V                       | 20.2 ± 1.4                              | 4                | < 0.0001 | No     | 34                           |
| NF54 MDR1 <sup>Cas9</sup> M841I       | 7.7 ± 1.6                               | 2                | < 0.0001 | No     | 13                           |
| NF54 MDR1 <sup>Cas9</sup> M924I       | 1.8 ± 0.3                               | 3                | < 0.0001 | Yes    | 3                            |
| NF54 MDR1 M841I/M924I                 | 45.4 ± 5.9                              | 4                | 0.0005   | Yes    | 76                           |
| NF54 MDR1 <sup>Cas9</sup> M841I/M924I | 38.5 ± 4.2                              | 4                | < 0.0001 | Yes    | 64                           |
| NF54 MDR1 Y1076H                      | 57.1 ± 4.1                              | 8                | < 0.0001 | No     | 95                           |

7G8 carries PfMDR1 mutations Y184F, S1034C, N1042D, and D1246Y; Dd2 carries PfMDR1 mutation N86Y; NF54 has no mutations in PfMDR1 compared to the standard reference strain 3D7. 7G8 MDR1 G316R, A807T, M841I, and Dd2 A807V were found in multiple clones, and each clone was profiled at least three times. For simplicity, parasites with the same genotype at PfMDR1 were grouped together. Parental lines were included in each assay of mutant lines. IC<sub>50</sub> values were calculated from 72 h dose-response data measured by flow cytometry of parasites stained with SYBR Green and Mitotracker Deep Red. Values indicate mean ± SEM, shown in nM. Significance determined by Student's t-test.

**Table S5. CRISPR-Cas9 engineered lines.**

| Name                                  | PfMDR1 amino acid |     | Cas9 | Selection     | Binding site silent mutations | Day positive | Cloned |
|---------------------------------------|-------------------|-----|------|---------------|-------------------------------|--------------|--------|
|                                       | 841               | 924 |      |               |                               |              |        |
| NF54 MDR1 parent                      | M                 | M   | N/A  | N/A           | N/A                           | N/A          | Yes    |
| NF54 MDR1 <sup>Cas9</sup> M841I       | I                 | M   | Yes  | ACT-451840    | Yes                           | 22           | No     |
| NF54 MDR1 <sup>Cas9</sup> M924I       | M                 | I   | Yes  | WR/BSD 6 days | Yes                           | 21           | Yes    |
| NF54 MDR1 <sup>Cas9</sup> M841I/M924I | I                 | I   | Yes  | ACT-451840    | Yes                           | 18, 17       | Yes    |

Red letters indicate residues that differ from parental line. N/A Not applicable. Selection: 2.7 nM ACT-451840; 2.5 nM WR99210; 2 μg ml<sup>-1</sup> blasticidin.

**Table S6. Cross-resistance to licensed antimalarials in asexual parasites.**

| Parasite                              | ACT-213615            |                              |                  |         | Halofantrine          |                              |                  |         |
|---------------------------------------|-----------------------|------------------------------|------------------|---------|-----------------------|------------------------------|------------------|---------|
|                                       | IC <sub>50</sub> (nM) | IC <sub>50</sub> fold change | Number of assays | p-value | IC <sub>50</sub> (nM) | IC <sub>50</sub> fold change | Number of assays | p-value |
| 7G8 MDR1 parent                       | 1.6 ± 0.3             | 1                            | 3                | -       | 0.12 ± 0.02           | 1                            | 6                | -       |
| 7G8 MDR1 G316R                        | 9.1 ± 1.0             | 6                            | 3                | <0.01   | 0.07 ± 0.02           | 0.6                          | 4                | 0.10    |
| 7G8 MDR1 A807T                        | N.D.                  | -                            | -                | -       | 0.14 ± 0.02           | 1.2                          | 6                | 0.53    |
| 7G8 MDR1 M841I                        | N.D.                  | -                            | -                | -       | 0.16 ± 0.02           | 1.3                          | 3                | 0.29    |
| Dd2 MDR1 parent                       | 1.2 ± 0.2             | 1                            | 3                | -       | 0.52 ± 0.09           | 1                            | 5                | -       |
| Dd2 MDR1 A807V                        | 25.2 ± 1.6            | 21                           | 3                | 0.0001  | 0.28 ± 0.08           | 0.5                          | 3                | 0.12    |
| NF54 MDR1 parent                      | 0.9 ± 0.1             | 1                            | 8                | -       | 0.8 ± 0.08            | 1                            | 7                | -       |
| NF54 MDR1 A807P                       | 33.5 ± 3.5            | 37                           | 3                | <0.0001 | N.D.                  | -                            | -                | -       |
| NF54 MDR1 <sup>Cas9</sup> M841I       | 16.5 ± 4.4            | 18                           | 2                | <0.0001 | N.D.                  | -                            | -                | -       |
| NF54 MDR1 <sup>Cas9</sup> M924I       | 7.1 ± 0.8             | 8                            | 3                | <0.0001 | N.D.                  | -                            | -                | -       |
| NF54 MDR1 <sup>Cas9</sup> M841I/M924I | 43.2 ± 7.8            | 6                            | 4                | <0.0001 | 0.6 ± 0.06            | 0.8                          | 7                | 0.07    |

  

| Parasite                              | Mefloquine            |                              |                  |         | Lumefantrine          |                              |                  |         |
|---------------------------------------|-----------------------|------------------------------|------------------|---------|-----------------------|------------------------------|------------------|---------|
|                                       | IC <sub>50</sub> (nM) | IC <sub>50</sub> fold change | Number of assays | p-value | IC <sub>50</sub> (nM) | IC <sub>50</sub> fold change | Number of assays | p-value |
| 7G8 MDR1 parent                       | 1.6 ± 0.3             | 1                            | 8                | -       | 0.6 ± 0.08            | 1                            | 7                | -       |
| 7G8 MDR1 G316R                        | 0.5 ± 0.1             | 0.3                          | 5                | 0.02    | 0.3 ± 0.06            | 0.5                          | 5                | 0.01    |
| 7G8 MDR1 A807T                        | 0.9 ± 0.1             | 0.6                          | 6                | 0.08    | 0.6 ± 0.04            | 1.0                          | 6                | 0.80    |
| 7G8 MDR1 M841I                        | 0.8 ± 0.2             | 0.5                          | 3                | 0.16    | 0.6 ± 0.1             | 1.0                          | 3                | 0.83    |
| Dd2 MDR1 parent                       | 12.0 ± 1.8            | -                            | 7                | -       | 2.9 ± 0.5             | 1                            | 6                | -       |
| Dd2 MDR1 A807V                        | 7.6 ± 1.7             | 0.6                          | 7                | 0.09    | 1.7 ± 0.3             | 0.6                          | 6                | <0.05   |
| NF54 MDR1 parent                      | 9.0 ± 1.0             | -                            | 10               | -       | 2.5 ± 0.3             | 1                            | 13               | -       |
| NF54 MDR1 A807P                       | 7.2 ± 1.3             | 0.8                          | 6                | 0.30    | 2.1 ± 0.2             | 0.8                          | 8                | 0.27    |
| NF54 MDR1 <sup>Cas9</sup> M841I       | 7.6 ± 1.7             | 0.8                          | 6                | 0.46    | 1.8 ± 0.2             | 0.7                          | 6                | 0.13    |
| NF54 MDR1 <sup>Cas9</sup> M924I       | 9.9 ± 0.8             | 1.1                          | 7                | 0.52    | 3.0 ± 0.4             | 1.2                          | 7                | 0.33    |
| NF54 MDR1 <sup>Cas9</sup> M841I/M924I | 7.6 ± 0.8             | 0.8                          | 10               | 0.29    | 1.3 ± 0.1             | 0.5                          | 3                | 0.06    |

  

| Parasite                              | Quinine               |                              |                  |         | Artesunate            |                              |                  |         |
|---------------------------------------|-----------------------|------------------------------|------------------|---------|-----------------------|------------------------------|------------------|---------|
|                                       | IC <sub>50</sub> (nM) | IC <sub>50</sub> fold change | Number of assays | p-value | IC <sub>50</sub> (nM) | IC <sub>50</sub> fold change | Number of assays | p-value |
| 7G8 MDR1 parent                       | 48.0 ± 8.6            | 1                            | 4                | -       | N.D.                  | -                            | -                | -       |
| 7G8 MDR1 G316R                        | 20.0 ± 2.4            | 0.4                          | 4                | 0.02    | N.D.                  | -                            | -                | -       |
| 7G8 MDR1 A807T                        | 40.8 ± 3.4            | 0.9                          | 6                | 0.40    | N.D.                  | -                            | -                | -       |
| 7G8 MDR1 M841I                        | 41.7 ± 1.7            | 0.9                          | 3                | 0.57    | N.D.                  | -                            | -                | -       |
| Dd2 MDR1 parent                       | 115.3 ± 13.8          | 1                            | 6                | -       | 3.7 ± 0.8             | 1                            | 2                | -       |
| Dd2 MDR1 A807V                        | 54.4 ± 9.1            | 0.5                          | 6                | 0.004   | 2.9 ± 0.3             | 0.8                          | 2                | 0.41    |
| NF54 MDR1 parent                      | 19.5 ± 2.8            | 1                            | 10               | -       | 4.1 ± 0.8             | 1                            | 3                | -       |
| NF54 MDR1 A807P                       | N.D.                  | -                            | -                | -       | N.D.                  | -                            | -                | -       |
| NF54 MDR1 <sup>Cas9</sup> M841I       | 14.0 ± 2.0            | 0.7                          | 4                | 0.26    | N.D.                  | -                            | -                | -       |
| NF54 MDR1 <sup>Cas9</sup> M924I       | 16.5 ± 3.3            | 0.8                          | 4                | 0.56    | N.D.                  | -                            | -                | -       |
| NF54 MDR1 <sup>Cas9</sup> M841I/M924I | 18.8 ± 3.3            | 1                            | 6                | 0.88    | 3.2 ± 0.3             | 0.8                          | 3                | 0.37    |

**Table S6 (continued). Cross-resistance to licensed antimalarials in asexual parasites.**

| Parasite                              | Chloroquine           |                              |                  |         | Monodesethyl chloroquine |                              |                  |         |
|---------------------------------------|-----------------------|------------------------------|------------------|---------|--------------------------|------------------------------|------------------|---------|
|                                       | IC <sub>50</sub> (nM) | IC <sub>50</sub> fold change | Number of assays | p-value | IC <sub>50</sub> (nM)    | IC <sub>50</sub> fold change | Number of assays | p-value |
| 7G8 MDR1 parent                       | 71.9 ± 11.2           | 1                            | 5                | -       | 220.6 ± 26.7             | 1                            | 7                | -       |
| 7G8 MDR1 G316R                        | 74.3 ± 9.3            | 1.0                          | 5                | 0.87    | 166.1 ± 20.7             | 0.8                          | 7                | 0.13    |
| 7G8 MDR1 A807T                        | N.D.                  | -                            | -                | -       | 179.2 ± 28.5             | 0.8                          | 6                | 0.31    |
| 7G8 MDR1 M841I                        | N.D.                  | -                            | -                | -       | 206.0 ± 39.5             | 0.9                          | 3                | 0.77    |
| Dd2 MDR1 parent                       | 133.2 ± 12.3          | 1                            | 3                | -       | 641.7 ± 64.2             | 1                            | 3                | -       |
| Dd2 MDR1 A807V                        | 127.8 ± 15.7          | 1.0                          | 3                | 0.80    | 625.1 ± 63.3             | 1.0                          | 3                | 0.86    |
| NF54 MDR1 parent                      | 12.5 ± 1.4            | 1                            | 8                | -       | 11.0 ± 2.5               | 1                            | 4                | -       |
| NF54 MDR1 A807P                       | N.D.                  | -                            | -                | -       | N.D.                     | -                            | -                | -       |
| NF54 MDR1 <sup>Cas9</sup> M841I       | 10.5 ± 0.9            | 0.8                          | 4                | 0.38    | 7.6 ± 1.5                | 0.7                          | 4                | 0.29    |
| NF54 MDR1 <sup>Cas9</sup> M924I       | 11.1 ± 1.9            | 0.9                          | 4                | 0.58    | 9.9 ± 0.7                | 0.9                          | 4                | 0.70    |
| NF54 MDR1 <sup>Cas9</sup> M841I/M924I | 20.2 ± 4.8            | 1.6                          | 4                | 0.07    | N.D.                     | -                            | N.D.             | -       |

  

| Parasite                              | Monodesethyl amodiaquine |                              |                  |         | Piperaquine           |                              |                  |         |
|---------------------------------------|--------------------------|------------------------------|------------------|---------|-----------------------|------------------------------|------------------|---------|
|                                       | IC <sub>50</sub> (nM)    | IC <sub>50</sub> fold change | Number of assays | p-value | IC <sub>50</sub> (nM) | IC <sub>50</sub> fold change | Number of assays | p-value |
| 7G8 MDR1 parent                       | 56.3 ± 7.0               | 1                            | 7                | -       | 15.5 ± 1.5            | 1                            | 4                | -       |
| 7G8 MDR1 G316R                        | 53.6 ± 9.0               | 1.0                          | 5                | 0.82    | 14.2 ± 1.3            | 0.9                          | 5                | 0.55    |
| 7G8 MDR1 A807T                        | 48.2 ± 7.5               | 0.9                          | 6                | 0.45    | 18.9 ± 1.0            | 1.2                          | 5                | 0.08    |
| 7G8 MDR1 M841I                        | 53.8 ± 7.1               | 1.0                          | 4                | 0.83    | 18.1 ± 1.3            | 1.2                          | 5                | 0.22    |
| Dd2 MDR1 parent                       | 30.7 ± 2.7               | 1                            | 6                | -       | 17.6 ± 1.9            | 1                            | 6                | -       |
| Dd2 MDR1 A807V                        | 27.8 ± 3.3               | 0.9                          | 6                | 0.52    | 20.9 ± 4.5            | 1.2                          | 6                | 0.52    |
| NF54 MDR1 parent                      | 14.5 ± 1.4               | 1                            | 6                | -       | 10.5 ± 1.0            | 1                            | 7                | -       |
| NF54 MDR1 A807P                       | N.D.                     | -                            | -                | -       | 12.7 ± 0.9            | 1.2                          | 4                | 0.19    |
| NF54 MDR1 <sup>Cas9</sup> M841I       | 8.4 ± 1.1                | 0.6                          | 4                | 0.01    | 11.3 ± 1.0            | 1.1                          | 4                | 0.63    |
| NF54 MDR1 <sup>Cas9</sup> M924I       | 8.5 ± 1.2                | 0.6                          | 4                | 0.02    | 11.0 ± 2.0            | 1.0                          | 3                | 0.80    |
| NF54 MDR1 <sup>Cas9</sup> M841I/M924I | 16.5 ± 0.01              | 1.1                          | 3                | 0.37    | 10.5 ± 1.2            | 1.0                          | 4                | 0.98    |

IC<sub>50</sub> values were calculated from 72 h dose-response data measured by flow cytometry of parasites stained with SYBR Green and Mitotracker Deep Red. Values indicate mean ± SEM, shown in nM. Significance determined by Student's t-test against parental lines.

**Table S7. Sensitivity to ACT-451840 in parental and resistant early and mature gametocytes.**

| Parasite                              | Stage II              |                              |                  |         | Stage V               |                              |                  |         |
|---------------------------------------|-----------------------|------------------------------|------------------|---------|-----------------------|------------------------------|------------------|---------|
|                                       | IC <sub>50</sub> (nM) | IC <sub>50</sub> fold change | Number of assays | p-value | IC <sub>50</sub> (nM) | IC <sub>50</sub> fold change | Number of assays | p-value |
| Dd2 MDR1 parent                       | 1.8 ± 0.7             | 1                            | 4                | -       | 2.1 ± 0.3             | 1                            | 2                | -       |
| Dd2 MDR1 A807V                        | 208.9 ± 108.6         | 116                          | 4                | 0.11    | 383.0 ± 175.4         | 182                          | 2                | 0.16    |
| NF54 MDR1 parent                      | 1.8 ± 0.4             | 1                            | 4                | -       | 3.9 ± 1.0             | -                            | 2                | -       |
| NF54 MDR1 <sup>Cas9</sup> M841I/M924I | 883.6 ± 382.1         | 491                          | 4                | 0.06    | 973.6 ± 15.4          | 249.6                        | 2                | 0.0003  |

Parasites are incubated with various concentrations of ACT-451840 for 48 h, then drug is washed out. 72 h later, cell viability was measured by a parasite lactate dehydrogenase assay. Significance determined by Student's t-test comparing mutant to parental line.

**Table S8. List of primers used in this study.**

| Primer | Sequence                                 | Lab identification | Assay                                          |
|--------|------------------------------------------|--------------------|------------------------------------------------|
| 1      | ATGGGTAAAGAGCAGAAAGAG                    | p3283              | <i>pfmdr1</i> genotyping                       |
| 2      | TATCTGCATCATTACCTGTATC                   | p314               | <i>pfmdr1</i> genotyping                       |
| 3      | TTCTAATTCTTGATGAAGCTACATC                | p3341              | <i>pfmdr1</i> genotyping                       |
| 4      | GCTCTAGCTATAGCTATTCTCTG                  | p4307              | <i>pfmdr1</i> genotyping                       |
| 5      | TTCAAACCAATCTGGATCTGCA                   | p238               | <i>pfmdr1</i> genotyping                       |
| 6      | ACGGACAAGAGTTGATACTGTTCAT                | p395               | <i>pfmdr1</i> genotyping                       |
| 7      | ATTTATGTTTGTGGTGCATATG                   | p3289              | <i>pfmdr1</i> genotyping                       |
| 8      | TTCTATAATGGACATGGTATTGT                  | p231               | <i>pfmdr1</i> genotyping                       |
| 9      | TAAACTATTTGTTGCTTCTAAAGCTTTTCAT          | p285               | <i>pfmdr1</i> genotyping                       |
| 10     | TAAATAGTGCAACGAATCAATACC                 | ALmdr1seqF2        | <i>pfmdr1</i> genotyping                       |
| 11     | TCTCATAATTGCTCTTGCAATGG                  | p3298              | <i>pfmdr1</i> genotyping                       |
| 12     | AATTTTCCAGCATAACTACCAGT                  | p290               | <i>pfmdr1</i> genotyping                       |
| 13     | ATTATGGTTTAGAAGATTATTTCTGTAATTTGA        | p425               | <i>pfmdr1</i> genotyping                       |
| 14     | ATGATCACATTATATTAATAAATGATATGACAA        | p426               | <i>pfmdr1</i> genotyping                       |
| 15     | TGATCAAAGAACTCATTTCTTGA                  | p233               | <i>pfmdr1</i> genotyping                       |
| 16     | GTATTTTAGTAGCTGGAGGATTATATCCC            | 7G8 FA5'           | <i>pfmdr1</i> pyrosequencing - M841I detection |
| 17     | 5'Biotin-AATATGTGCAGATAAAACACCTGGGG      | 7G8 FA3'           | <i>pfmdr1</i> pyrosequencing - M841I detection |
| 18     | CTATATATATTCTACTTATTGCTATTGCTAT          | 7G8 pyro           | <i>pfmdr1</i> pyrosequencing - M841I detection |
| 19     | 5'Biotin- GACTCAGATACAGGTAATGATGCAG      | p4063              | <i>pfmdr1</i> pyrosequencing - A807V detection |
| 20     | TGAACATAGCAATAGCAATAAGTAG                | p4064              | <i>pfmdr1</i> pyrosequencing - A807V detection |
| 21     | GATACATATCTAGCATATAATAAA                 | p4065              | <i>pfmdr1</i> pyrosequencing - A807V detection |
| 22     | TTATAACAACAAAATAGGAGAAAAAGTCG            | PCR_FG2772AMDR     | <i>pfmdr1</i> pyrosequencing - M921I detection |
| 23     | 5'Biotin- CTCAATTTCTTTACTTTTGGTTAATCTAGC | PCR_RG2772AMDR     | <i>pfmdr1</i> pyrosequencing - M921I detection |
| 24     | CATAATGCTCTTTCTGGTTAGCATGGTTAT           | p4085              | <i>pfmdr1</i> pyrosequencing - M921I detection |

## REFERENCES

- Bruderer, S., Hurst, N., de Kanter, R., Miraval, T., Pfeifer, T., Donazzolo, Y. and Dingemans, J. (2015) First-in-humans study of the safety, tolerability, and pharmacokinetics of ACT-451840, a new chemical entity with antimalarial activity. *Antimicrob Agents Chemother* **59**: 935-942.
- Brunner, R., Aissaoui, H., Boss, C., Bozdech, Z., Brun, R., Corminboeuf, O., *et al.* (2012) Identification of a new chemical class of antimalarials. *J Infect Dis* **206**: 735-743.
- Doench, J.G., Hartenian, E., Graham, D.B., Tothova, Z., Hegde, M., Smith, I., *et al.* (2014) Rational design of highly active sgRNAs for CRISPR-Cas9-mediated gene inactivation. *Nat Biotechnol* **32**: 1262-1267.
- Gabryszewski, S.J., Modchang, C., Musset, L., Chookajorn, T. and Fidock, D.A. (2016) Combinatorial genetic modeling of *pfcr1*-mediated drug resistance evolution in *Plasmodium falciparum*. *Mol Biol Evol* doi:10.1093/molbev/msw037 [Epub ahead of print].
- Hartl, D.L., Dykhuizen, D.E. and Dean, A.M. (1985) Limits of adaptation - the evolution of selective neutrality. *Genetics* **111**: 655-674.
